# Supplementary material for: Retinal Sensitivity and Ganglion Cell-Related Retinal Layer Thickness in the Normal Aging&nbsp;Process&nbsp;
Source: Research Square preprint supplement (doi:10.21203/rs.3.rs-149830/v1), 2021-01-21
Supplement: Supplementary file 1 [file bb95f89ef0d973128fe55e86.pdf]

| Parameter                                       | Mean (standard deviation) |
|-------------------------------------------------|---------------------------|
| Number of subjects (eyes; right/left)           | 37 (72; 36/36)            |
| Age (years)                                     | 51.3 (12.9)               |
| AL (mm)                                         | 24.3 (1.0)                |
| Spherical equivalent refraction (diopters)      | -1.55 (2.02)              |
| Best-corrected decimal visual acuity            | 1.5 (0.9 ~ 1.5)*          |
| Central corneal thickness ( $\mu\text{m}$ )     | 515 (29)                  |
| Corneal curvature (mm)                          | 7.75 (0.28)               |
| IOP (mmHg)                                      | 13.6 (0.8)                |
| Disc area ( $\text{mm}^2$ )                     | 2.21 (0.37)               |
| VF <sub>mean</sub> (dB)                         | 30.3 (1.1)                |
| VF <sub>4TestPoints</sub> (dB)                  | 33.0 (0.8)                |
| CpRNFLT ( $\mu\text{m}$ )                       | 106.8 (8.7)               |
| GCIPLT <sub>4TestPoints</sub> ( $\mu\text{m}$ ) | 87.8 (6.4)                |

1 **Table 1. Summary of subjects' characteristics.**

2 The data are expressed as the mean (standard deviation). VF<sub>mean</sub>, mean visual field (VF)  
3 sensitivities (dB) of 52 test points of the HFA 24-2 test; VF<sub>4TestPoints</sub>, mean VF sensitivity  
4 of the central 4 test points of the HFA 24-2; cpRNFLT, circumpapillary retinal nerve fiber  
5 layer thickness measured and averaged over the entire circumference of the circle with  
6 a diameter of 3.4 mm centered on the barycenter of clinical disc; GCIPLT<sub>4TestPoints</sub>, mean  
7 ganglion cell-inner plexiform layer thicknesses in a circular retinal area with a diameter  
8 of 0.6 mm (approximately 2 degrees of the visual angle) corresponding to the four  
9 central test points of the HFA 24-2, adjusted for RGC displacement according to Drasdo  
10 *et al.* [25]. All measured values listed were obtained at the baseline examination.

11 \*Median (range).

12

| Item                                      | Estimate* | Standard error | p value |
|-------------------------------------------|-----------|----------------|---------|
| Intercept                                 | 13.9      | 2.7            | <0.001  |
| Duration=time (years)                     | -0.121    | 0.019          | <0.001  |
| VF <sub>mean</sub> at baseline (dB)       | 0.604     | 0.058          | <0.001  |
| VF <sub>mean</sub> at baseline × duration | -0.111    | 0.005          | <0.001  |
| Age at baseline (years)                   | -0.021    | 0.005          | <0.001  |
| Age at baseline × duration                | -0.009    | 0.002          | <0.001  |
| AL (mm)                                   | -0.022    | 0.061          | 0.725   |
| AL × duration                             | 0.006     | 0.020          | 0.777   |

13 **Table 2. Factors contributing to the aging-related changes in VF<sub>mean</sub> in normal**  
14 **Japanese subjects.**  
15 VF<sub>mean</sub>, mean visual field sensitivity of 52 test points of the HFA 24-2 test; VF<sub>mean</sub> at  
16 baseline × duration, interaction between VF<sub>mean</sub> at baseline and duration (time lapse  
17 from the baseline measurement); age at baseline × duration, interaction between age  
18 and duration (time lapse from the baseline measurement); AL × duration, interaction  
19 between AL and duration (time lapse from the baseline measurement). \*Estimated  
20 coefficient value.

21

22

| Item                                       | Estimate* | Standard error | p value |
|--------------------------------------------|-----------|----------------|---------|
| Intercept                                  | 21.9      | 3.42           | <0.001  |
| Duration=time (years)                      | -0.185    | 0.027          | <0.001  |
| VF <sub>4TestPoints</sub> at baseline (dB) | 0.432     | 0.070          | <0.001  |
| VF <sub>4TestPoints</sub> × duration       | -0.143    | 0.031          | <0.001  |
| Age at baseline (years)                    | -0.028    | 0.006          | <0.001  |
| Age at baseline × duration                 | -0.010    | 0.002          | <0.001  |
| AL (mm)                                    | -0.063    | 0.068          | 0.356   |
| Al × duration                              | -0.010    | 0.029          | 0.729   |

23 **Table 3. Factors contributing to aging-related changes in VF<sub>4TestPoints</sub> in normal**  
24 **Japanese subjects.**  
25 VF<sub>4TestPoints</sub>, mean VF sensitivity of the central four test points of the HFA 24-2 test;  
26 VF<sub>4TestPoints</sub> at baseline × duration, interaction between VF<sub>4TestPoints</sub> at baseline and  
27 duration (time lapse from the baseline measurement); age at baseline × duration,  
28 interaction between baseline age and duration (time lapse from the baseline  
29 measurement); AL × duration, interaction between AL and duration (time lapse from  
30 the baseline measurement). \*Estimated coefficient value.

31

32

33

| Item                                  | Estimate* | Standard error | p value |
|---------------------------------------|-----------|----------------|---------|
| Intercept                             | 5.48      | 1.94           | 0.005   |
| Duration=time (years)                 | 0.067     | 0.072          | 0.352   |
| CpRNFLT at baseline ( $\mu\text{m}$ ) | 1.00      | 0.009          | <0.001  |
| CpRNFLT at baseline $\times$ duration | 0.001     | 0.010          | 0.934   |
| Age at baseline (years)               | -0.025    | 0.006          | <0.001  |
| Age at baseline $\times$ duration     | -0.021    | 0.006          | 0.001   |
| Axial length (mm)                     | -0.153    | 0.071          | 0.030   |
| Axial length $\times$ duration        | -0.132    | 0.075          | 0.078   |
| Disc area ( $\text{mm}^2$ )           | -0.619    | 0.181          | <0.001  |
| Disc area $\times$ duration           | -0.128    | 0.192          | 0.505   |

34 **Table 4. Factors contributing to aging-related changes in the cpRNFLT in normal**  
35 **Japanese subjects.**

36 CpRNFLT, circumpapillary retinal nerve fiber layer thickness measured and averaged  
37 over whole circumference of the circle with a diameter of 3.4 mm centered on the  
38 barycenter of clinical disc; cpRNFLT at baseline  $\times$  duration, interaction between the  
39 cpRNFLT at baseline and duration (time lapse from the baseline measurement); age at  
40 baseline  $\times$  duration, interaction between baseline age and duration (time lapse from  
41 the baseline measurement); AL  $\times$  duration, interaction between AL and duration (time  
42 lapse from the baseline measurement); disc area  $\times$  duration, interaction between disc  
43 area and duration (time lapse from the baseline measurement). \*Estimated coefficient  
44 value.

45  
46

| Item                                                 | Estimate* | Standard error | p value |
|------------------------------------------------------|-----------|----------------|---------|
| Intercept                                            | 4.69      | 1.16           | <0.001  |
| Duration=time (years)                                | -0.064    | 0.040          | 0.114   |
| GCIPLT <sub>4TestPoints</sub> at baseline (μm)       | 0.992     | 0.006          | <0.001  |
| GCIPLT <sub>4TestPoints</sub> at baseline × duration | -0.008    | 0.007          | 0.238   |
| Age at baseline (years)                              | -0.025    | 0.003          | <0.001  |
| Age at baseline × duration                           | -0.010    | 0.0034         | 0.004   |
| AL (mm)                                              | -0.092    | 0.039          | 0.019   |
| AL × duration                                        | -0.056    | 0.041          | 0.174   |
| Disc area (mm <sup>2</sup> )                         | -0.191    | 0.097          | 0.048   |
| Disc area × duration                                 | -0.188    | 0.102          | 0.067   |

47 **Table 5. Factors contributing to aging-related changes in the GCIPLT<sub>4TestPoints</sub> in normal**  
48 **Japanese subjects.**

49 GCIPLT<sub>4TestPoints</sub>, the mean of ganglion cell-inner plexiform layer thicknesses in a circular  
50 retinal area with a diameter of 0.6 mm (corresponding to about 2 degrees of visual  
51 angle) in the four central test points of the HFA 24-2 test, adjusted for RGC  
52 displacement according to Drasdo et al. [25] GCIPLT<sub>4TestPoints</sub> at baseline × duration,  
53 interaction between the GCIPLT<sub>4TestPoints</sub> at baseline and duration (time lapse from the  
54 baseline measurement); age at baseline × duration, interaction between baseline age  
55 and duration (time lapse from the baseline measurement); AL × duration, interaction  
56 between AL and duration (time lapse from the baseline measurement); disc area ×  
57 duration, interaction between disc area and duration (time lapse from the baseline  
58 measurement). \*Estimated coefficient value.

59
